15 **Abstract:**

16 Aluminum adjuvants have been used for a century in various vaccines due to its ability to  
17 potentiate humoral immunity and safety records since 1920s. Manganese is an essential  
18 micronutrient required for diverse biological activities in cells. We previously found that  $Mn^{2+}$  is a  
19 strong type I-interferon stimulator activating the cGAS-STING pathway. Herein we report that a  
20 colloidal manganese salt (MnJ) is a potent adjuvant to induce both humoral and cellular immune  
21 responses, particularly CTL activation. When administrated intranasally, MnJ was also a strong  
22 mucosal adjuvant, inducing high levels of IgA antibodies. MnJ strongly promoted dendritic cell  
23 maturation and antigen-specific T cell activation. Interestingly, IL-1/-18 induction and release by  
24  $Mn^{2+}$ -activated ASC-mediated inflammasomes were not observed. MnJ showed great adjuvant  
25 effects to all tested antigens including inactivated viruses, recombinant proteins and peptides by  
26 either intramuscular or intranasal immunization. These findings may have implications in  
27 developing potent but safe  $Mn^{2+}$ -containing vaccines.

28 **Main Text:**

29 Vaccination is one of the most successful public health interventions. Adjuvants are widely used to  
30 increase the immunogenicity of vaccines with various advantages: (1) reducing the amount of  
31 antigens; (2) reducing the number of immunizations; (3) inducing a faster protection; (4)  
32 improving the efficacy of vaccines in newborns, the elderly or immunocompromised populations  
33 <sup>1,2</sup>. Over the past few decades, large amounts of adjuvants have been developed. According to their  
34 different mechanisms of action, adjuvants are divided into two categories: immune potentiators and

35 delivery systems. Some immune potentiators, composed of pathogen-associated molecular patterns  
36 (PAMPs) or synthesized activators of pattern-recognition receptors (PPRs), activate innate immune  
37 responses to induce the subsequent production of cytokines and chemokines. Other potentiators,  
38 composed of cells or cytokines like dendritic cells, IL-12 or GM-CSF, directly activate immunity.  
39 Delivery systems including liposome, micelles, virosome, nanoparticles, microsphere, Oil/Water  
40 emulsion, virus-like particles (VLP) and immune stimulating complexes (ISCOM), usually carry  
41 antigen to target cells and assist antigen uptake by antigen presenting cells (APCs) <sup>3,4</sup>.

42 The immune enhancement effect of aluminum salts (Alum) was first reported by Glenny et al. in  
43 the 1920's when they found that injection of guinea pigs with diphtheria toxoid precipitated with  
44 potassium aluminum provided greater protection than toxoid alone <sup>5</sup>. Since then, Alum-containing  
45 adjuvants have been employed in billions of doses of vaccines and administered annually to  
46 millions of people <sup>6</sup>. In fact, Alum is the only human adjuvant widely used, partly due to its  
47 minimal reactogenicity and inexpensiveness <sup>7</sup>. However, Alum-adjuvanted vaccines need repeated  
48 administrations which may cause or manifest its adverse effects including increased IgE production  
49 and neurotoxicity <sup>8</sup>. In addition, Alum mainly induces T helper 2 (TH2) cell response through  
50 NLRP3 inflammasome activation <sup>9-11</sup>, but not TH1 or cytotoxic T-lymphocyte (CTL) response <sup>1,12</sup>.  
51 Therefore, Alum is generally believed to be unable to elicit cellular immune responses that are  
52 essential for virus or tumor vaccines.

53 In the past decades, however, the medical need for new adjuvants is increasing as (1) the  
54 tremendously increased use of purified antigens like recombinant proteins with low

55 immunogenicity due to the absence of immunostimulatory components recognized by PRRs; (2)  
56 adjuvants inducing cellular immune responses especially CTL are badly needed for virus and  
57 cancer vaccines<sup>13-15</sup>. So far few adjuvants have been approved by the US Food and Drug  
58 Administration for use in humans and several formulations are in clinical trials. The oil-in-water  
59 MF59 in influenza vaccines for the elderly was approved in the 1990's, followed by AS03 in  
60 vaccines against avian influenza virus, AS04 in hepatitis B virus (HBV) and human papillomavirus  
61 (HPV) vaccines, and AS01 in herpes zoster virus vaccines<sup>16</sup>. Toll-like receptor (TLR) agonists,  
62 like the CpG DNA and poly (I:C), have been studied in the past two decades as new adjuvant  
63 candidates<sup>7</sup>. cGAS-STING<sup>17-20</sup> agonists like DMXAA<sup>21</sup>, c-di-GMP<sup>22</sup>, cGAMP<sup>23</sup> and Chitosan<sup>24</sup>  
64 also showed some adjuvant effects.

65 Manganese (Mn) is a nutritional inorganic trace element required for a variety of physiological  
66 processes including development, reproduction, neuronal function and antioxidant defenses<sup>25,26</sup>.  
67 Mn (Mn<sup>2+</sup> in general cases) is essential for some metalloenzymes such as Mn superoxide dismutase  
68 (SOD2, Mn<sup>3+</sup> or Mn<sup>2+</sup> in this case), glutamine synthetase (GS), and arginase<sup>27</sup>. However, its  
69 function in regulating immunity is largely unknown. Previously we found that Mn<sup>2+</sup> was required  
70 for the host defense against DNA virus by increasing the sensitivity of the DNA sensor cGAS and  
71 its downstream adaptor protein STING. Mn<sup>2+</sup> was released from mitochondria and Golgi apparatus  
72 upon virus infection and accumulated in the cytosol where it bound directly to cGAS, enhancing  
73 the sensitivity of cGAS to double-stranded DNA (dsDNA) and its enzymatic activity. Mn<sup>2+</sup> also  
74 enhanced cGAMP-STING binding affinity<sup>28</sup>. Importantly, Mn<sup>2+</sup> was a potent innate immune  
75 stimulator, inducing type I-IFN and cytokine production in the absence of any infection.

76 Herein we report that Manganese ( $Mn^{2+}$ ) functions as a universal non-inflammatory adjuvant to  
77 induce both humoral and cellular immune responses, particularly CTL activation. A colloidal  
78 manganese salt (MnJ) was found to strongly promote dendritic cell maturation and antigen-specific  
79 T cell activation. When administrated intranasally, MnJ was also a strong mucosal adjuvant,  
80 inducing high levels of IgA antibodies. MnJ showed great adjuvant effects to all tested antigens  
81 including inactivated viruses, recombinant proteins and peptides by either intramuscular or  
82 intranasal immunization. Thus, we identified the second metal element that functions as adjuvant  
83 nearly one hundred years after Alum was found.

#### 84 **Results:**

##### 85 **$Mn^{2+}$ Promotes DC Maturation via cGAS-STING Activation**

86 We previously found that  $Mn^{2+}$  is a strong type I-IFN stimulator by activating the cGAS-STING  
87 pathway in the absence of any infections *in vitro* and *in vivo*, we thus hypothesized that  $Mn^{2+}$   
88 would have some adjuvant potentials. Since APCs play an important role in linking innate and  
89 adaptive immunity, we first determined whether  $Mn^{2+}$  promotes DC maturation. RNA-seq analysis  
90 on  $Mn^{2+}$ - or LPS-treated mouse bone marrow derived dendritic cells (BMDCs) revealed that  $Mn^{2+}$   
91 induced robust production of both IFN $\beta$  and various IFN $\alpha$ s, which were not induced by LPS (Fig.  
92 1a), together with significantly up-regulated costimulatory molecules CD80 and CD86, mouse  
93 MHC-I proteins H-2K/D/Q, immunoproteasome subunits PSMB8/9, peptide transporters TAP1/2  
94 and chemokines, including CCL2 and CCL3, that increase the recruitment of immune cells to the  
95 injection site. Surprisingly, compared to LPS-treated BMDCs,  $Mn^{2+}$ -treated BMDCs did not

96 produce pro-inflammatory cytokines including IL-1 $\alpha$ / $\beta$  and IL-18, nor IL-10 or IL-12, suggesting  
97 that Mn<sup>2+</sup> triggered a distinct signaling in BMDCs, which were confirmed by qPCR analysis (Fig.  
98 1b). Additionally, Mn<sup>2+</sup>-induced expression of costimulatory molecules CD86, CD80 and CD40  
99 were lost in BMDCs from *Tmem173*<sup>-/-</sup>, *Irf3*<sup>-/-</sup>*Irf7*<sup>-/-</sup> and *Ifnar*<sup>-/-</sup> mice, showing that Mn<sup>2+</sup>-induced  
100 DC maturation was completely dependent on the activation of the cGAS-STING pathway (Fig.  
101 1c).

### 102 **Mn<sup>2+</sup> Activates NLRP3 Inflammasome**

103 Alum has been shown to activate the NLRP3 inflammasome and the capacity of Alum to promote  
104 antibody production was compromised in *Caspase1*<sup>-/-</sup>, *Pycard*<sup>-/-</sup> or *Nlrp3*<sup>-/-</sup> mice<sup>9-11</sup>. To compare  
105 the ability of Mn<sup>2+</sup> and Aluminium-containing adjuvants (Imject® Alum, Alhydrogel® adjuvant  
106 and Adju-Phos® adjuvant) to activate innate immunity, we tested the production of type I-IFNs and  
107 pro-inflammatory cytokines IL-1 $\beta$  and IL-18 in peritoneal macrophages treated with Mn<sup>2+</sup> or  
108 various Alums. Only Mn<sup>2+</sup> induced type I-IFNs (Fig. 2a). Mn<sup>2+</sup> also activated stronger  
109 inflammasome than Imject® Alum and Alhydrogel® Alum did (Fig. 2b, c), which was entirely  
110 dependent on ASC, mainly on NLRP3 (Fig. 2d-g). Interestingly, Mn<sup>2+</sup>-induced inflammasome  
111 activation in mouse cells was different from THP1 cells, which showed a complete  
112 NLRP3-dependence (Fig. 2h, Extended Data Fig. 1a). Moreover, cGAS or STING deficiency did  
113 not affect Mn<sup>2+</sup>-activated inflammasome in macrophages from *Cgas*<sup>-/-</sup>, *Tmem173*<sup>-/-</sup> mice or  
114 *CGAS*<sup>-/-</sup>, *TMEM173*<sup>-/-</sup> THP1 cells (Extended Data Fig. 1b-e), indicating that cGAS-STING  
115 -induced lysosomal cell death<sup>29</sup>, or cGAMP production<sup>30</sup> was not essential for Mn<sup>2+</sup>-induced

116 inflammasome. Instead, we found that N-acetyl-L-cysteine (NAC, a direct scavenger of ROS),  
117 reduced L-glutathione (GSH, an intracellular thiol antioxidant), extracellular K<sup>+</sup>, or 2-APB (a  
118 cytosolic Ca<sup>2+</sup> release inhibitor) all restrained Mn<sup>2+</sup>-induced inflammasome activation (Extended  
119 Data Fig. 2a-g). Using a modified culture medium, Hanks' Balanced Salt Solution Deletion of  
120 PO<sub>4</sub><sup>3-</sup> and CO<sub>3</sub><sup>2-</sup> (herein HBSSD), in which Mn<sup>2+</sup> and Ca<sup>2+</sup> did not form particles, we found that  
121 Mn<sup>2+</sup> activated NLRP3 and pyroptosis were essentially independent of particle formation, which is  
122 different from Ca<sup>2+</sup> (Extended Data Fig. 2h, i). mtDNA depletion (Extended Data Fig. 2j) by  
123 ethidium bromide<sup>28</sup> did not affect Mn<sup>2+</sup>-induced inflammasome activation either (Extended Data  
124 Fig. 2k, l). We thus concluded that Mn<sup>2+</sup> activated stronger NLRP3 inflammasome than Alum did.

#### 125 **Mn<sup>2+</sup> Activates Inflammasome without IL-1/-18 Production**

126 Consistent with results from RNA-seq and qPCR (Fig. 1a, b), Mn<sup>2+</sup> treatment did not induce  
127 upregulation of *Il1b* and *Il18* in both murine BMDCs and human monocyte derived dendritic cells  
128 (Mo-DCs) (Fig. 3a). Interestingly, Alum activated NLRP3 inflammasome in a similar way, neither  
129 Mn<sup>2+</sup> nor Alum induced IL-1/18 production without LPS priming (Fig. 3b, c). The same results  
130 were obtained when human peripheral blood mononuclear cells (PBMCs) were treated with Mn<sup>2+</sup>  
131 (Fig. 3d). Since clinical studies on various inflammatory diseases suggested the crucial role for  
132 IL-1/-18 but not for TNF $\alpha$ , which only amplified and perpetuated the damage<sup>31</sup>, we held that  
133 Mn<sup>2+</sup>-activated inflammasome did not cause systematic inflammation but may still be critical for  
134 its adjuvant activity (see below).

#### 135 **MnJ Is A Potent Universal Adjuvant**

136 Given that  $Mn^{2+}$  induced strong type I-IFN production and NLRP3 inflammasome activation, we  
137 reasoned that  $Mn^{2+}$  could be used as an adjuvant. To test this, we first immunized C57BL/6 mice  
138 with LPS-free chicken ovalbumin protein (OVA) alone or OVA with different  $Mn^{2+}$  solutions  
139 intramuscularly (i.m.) or intranasally (i.n.) and measured OVA-specific antibodies. Surprisingly,  
140 we found that only  $Mn^{2+}$  in phosphate buffer saline (PBS), but not  $Mn^{2+}$  in normal saline,  
141 promoted antibody production (Extended Data Fig. 3a, b). The difference was that  $Mn^{2+}$  formed  
142 particles in PBS but not in saline, suggesting that soluble  $Mn^{2+}$  was unable to induce a local  
143 immune response as expected. However,  $Mn^{2+}$  particles in PBS tended to aggregate and precipitate  
144 with time, thus lost its adjuvant activity (Extended Data Fig. 3c). By screening various manganese  
145 compounds, we generated jelly-like  $Mn^{2+}$  colloids (MnJ, Mn Jelly) (Extended Data Fig. 3d)  
146 consisting of elongate nanoparticles approximately  $2 \times 2 \times 6$  nm in size (Extended Data Fig. 3e).  
147 MnJ was stable without aggregation in the following experiments. Its adjuvant effect was not  
148 weakened after storage at  $-80$  °C for three weeks or longer, or even after freeze–  
149 drying/lyophilization (Extended Data Fig. 3f). On the contrary, Alum vaccines are known to be  
150 sensitive to freezing and thus hard to store or transport. Interestingly, MnJ triggered comparable  
151 inflammasome activation (Extended Data Fig. 3g), but stronger type I-IFN production than  $MnCl_2$   
152 or  $Mn^{2+}$ -PBS did (Extended Data Fig. 3h), probably due to the facilitated transportation into cells  
153 as nanoparticles<sup>32,33</sup>. Compared to  $MnCl_2$ , which disappeared within hours, MnJ had a much  
154 longer muscle retention time up to 8 days at the site of injection, similar to  $Mn^{2+}$ -PBS particles  
155 (Extended Data Fig. 3i). Splenocytes were isolated from OVA-immunized mice and stimulated  
156 with major histocompatibility class II (MHC-II)-binding OVA peptide I-A<sup>b</sup> and MHC-I-binding



157 peptide H-2K<sup>b</sup> to compare T cell activation. IFN $\gamma$  induced in splenocytes from OVA-MnJ was  
158 higher than OVA-Mn<sup>2+</sup> (Extended Data Fig. 3j). Consequently, the adjuvant effect of MnJ was  
159 significantly better than that of Mn<sup>2+</sup>-PBS (Extended Data Fig. 3a-c).

160 We next evaluated the detailed adjuvant effect of MnJ. MnJ-adjuvanted antibody induction by  
161 intramuscularly immunization showed dose-dependence and lasted for at least 6 months (Fig. 4a).

162 Compared to three different Aluminum-containing adjuvants, MnJ induced much stronger  
163 OVA-specific IgG1 production and CTL response (Fig. 4b). We also compared MnJ with other  
164 adjuvants including the complete Freund's adjuvant (CFA), incomplete Freund's adjuvant (IFA),  
165 MF59 and polyetherimide (PEI). We found that MnJ adjuvant effect was even better than CFA (20  
166  $\mu$ g MnJ vs 50  $\mu$ l CFA, i.m.) and MF59 (20  $\mu$ g MnJ vs 50  $\mu$ l MF59, i.m.) (Extended Data Fig. 3k, l).

167 Also, MnJ boosted specific antibody production against different recombinant protein/peptide  
168 antigens, including influenza A/PR8 hemagglutinin A1 peptide, haptenized experimental antigen  
169 nitrophenol-conjugatd keyhole limpet hemocyanin (NP-KLH), HBV surface antigen (HBsAg) and  
170 HBSS1 fusion protein (containing S (1-223 aa) and PreS1 (21-47 aa))<sup>34</sup>, and inactivated  
171 enterovirus type 71 (EV71) (Fig. 4d). Besides, intranasally immunization revealed that MnJ was  
172 also a potent mucosal adjuvant, inducing high levels of IgA antibodies in lung, saliva, and serum  
173 for a long time and as good as cholera toxin B (5  $\mu$ g MnJ vs 10  $\mu$ g CTB, i.n.)<sup>35</sup> (Fig. 4e, f).

174 Importantly, compared to CFA-injected mice showing prominent swellings and granulomas with  
175 one shoot (Extended Data Fig. 4a), MnJ-injected mice displayed no visible side effects on injection  
176 site, body weight, survival or different organs even after repeated administrations (3 shoots in 3

177 consecutive weeks) (Extended Data Fig. 4a-i), suggesting that MnJ is a safe adjuvant with good  
178 biocompatibility.

### 179 **MnJ Promotes Antigen Presentation and T Cell Responses**

180 MF59 and Alum facilitate APCs to engulf antigens and transport them to draining lymph nodes  
181 (dLNs), and also induce the differentiation of monocytes to dendritic cells (Mo-DCs) <sup>36,37</sup>. So, we  
182 next evaluated antigen uptake by APCs and Mo-DC differentiation in dLNs after MnJ  
183 administration. We immunized mice in both inguinal regions subcutaneously with fluorescent  
184 protein Phycoerythrin (PE) containing MnJ or Alum adjuvant. APCs in inguinal lymph nodes were  
185 analyzed by flow cytometry afterwards. The percentage and number of PE-loaded APCs were  
186 significantly enhanced 12 and 24 h after MnJ immunization (Fig. 5a). Also, there was a significant  
187 increase in the accumulation of Mo-DCs in mice immunized with antigen plus MnJ compared to  
188 that in mice immunized with antigen alone (Fig. 5b).

189 The capacity of MnJ to promote BMDC maturation was stronger compared with Mn<sup>2+</sup>, while Alum  
190 did not have any effect (Fig. 5c). *In vivo*, MnJ enhanced both CD4<sup>+</sup> and CD8<sup>+</sup> T cell proliferation,  
191 whereas Alum only induced a weak CD4<sup>+</sup> T cell proliferation (Fig. 5d). Splenocytes were next  
192 isolated from OVA-immunized mice and stimulated with OVA to compare T cell activation. IL-2  
193 and IFN $\gamma$  were highly induced in splenocytes from OVA-MnJ, but not OVA-Alum immunized  
194 mice, whereas IL-4 and IL-10 were preferably produced via OVA-Alum immunization (Fig. 5e),  
195 indicating that MnJ potently stimulated TH1 response, in addition to TH2 response. Accordingly,  
196 *in vivo* cytotoxic assay showed that MnJ immunized mice generated very strong CTL activities in

197 killing OVA-bearing cells, which was absent in Alum immunized mice (Fig. 5f). MnJ also  
198 promoted the formation of germinal center (GC) with significantly increased amounts of Tfh and  
199 GC B cells (Fig. 5g).

## 200 **Both cGAS-STING and NLRP3 Inflammasome Contribute to Adjuvant Activity of MnJ**

201 Next, *Tmem173*<sup>-/-</sup>, *Mavs*<sup>-/-</sup>, *Nlrp3*<sup>-/-</sup>, *Nlr4*<sup>-/-</sup>, *Aim2*<sup>-/-</sup> or *Pycard*<sup>-/-</sup> mice were used to test which  
202 pathway is involved in MnJ's adjuvant effect. It was found that although *Tmem173*<sup>-/-</sup>, *Pycard*<sup>-/-</sup> or  
203 *Nlrp3*<sup>-/-</sup> mice produced diminished OVA-specific antibodies (Extended Data Fig. 5a),  
204 *Tmem173*<sup>-/-</sup>*Pycard*<sup>-/-</sup> (double knockout, DKO) mice generated extremely decreased OVA-specific  
205 antibodies (Fig. 6a-c), suggesting that both cGAS-STING and inflammasome contributed to MnJ  
206 adjuvant effect. Further, *Tmem173*<sup>-/-</sup>*Nlrp3*<sup>-/-</sup> mice generated a bit more antibodies than  
207 *Tmem173*<sup>-/-</sup>*Pycard*<sup>-/-</sup> mice did (Fig. 6a-b), indicating the involvement of other ASC-dependent  
208 inflammasome activation by MnJ. We also analyzed the expression of *Dock2*, which was reported  
209 to be down-regulated in *Pycard*<sup>-/-</sup> but not *Nlrp3*<sup>-/-</sup> or *Caspase1*<sup>-/-</sup> mice<sup>38</sup>. Quantitative PCR  
210 analysis confirmed the same expression of *Dock2* mRNA in WT, *Tmem173*<sup>-/-</sup>, *Pycard*<sup>-/-</sup>, *Nlrp3*<sup>-/-</sup>,  
211 *Tmem173*<sup>-/-</sup>*Pycard*<sup>-/-</sup> and *Tmem173*<sup>-/-</sup>*Nlrp3*<sup>-/-</sup> mice (Extended Data Fig. 5b). Consistently,  
212 MnJ-promoted germinal center formation was impaired in the DKO (specifically referred to  
213 *Tmem173*<sup>-/-</sup>*Pycard*<sup>-/-</sup> in the following text) mice (Extended Data Fig. 5c). In addition,  
214 MnJ-induced OT-II CD4<sup>+</sup> T cell proliferation disappeared in the DKO mice (Fig. 6d), along with  
215 sharply reduced IFN $\gamma$  and IL-2 production by peptide-stimulated splenic T cells (Fig. 6e).  
216 Consistent with previous results (Fig. 3d, e), no IL-1 $\beta$  induction was detected in lymph nodes from

217 MnJ-treated mice *in vivo*, despite of ISG production and GSDMD cleavage (Fig. 6f). Since neither  
218  $Mn^{2+}$  nor MnJ treatment did induce IL-1 or IL-18 expression *in vitro* or *in vivo*, we reasoned that  
219 ASC-mediated inflammasome activation contributed to MnJ adjuvant activity by releasing other  
220 DAMPs like uric acid<sup>39</sup>, but not by IL-1 or TNF $\alpha$ , consistent with previous reports that neither of  
221 them was important for adjuvant effect<sup>22,40</sup>. However, CFA or Monophosphoryl Lipid A (MPLA)  
222 induced antibody production did not change much among these mice (Extended Data Fig. 5d, e).

### 223 **MnJ Is A Potent Adjuvant for Antiviral and Antitumor Vaccines**

224 Next we tested the protection effect of MnJ adjuvanted vaccines against various viruses.  
225 Formaldehyde-inactivated Vesicular stomatitis virus (VSV), Herpes simplex virus 1 (HSV-1) and  
226 Vaccinia Virus (VACV) were used as vaccines. The optimal dose for each inactivated virus was  
227 first determined (VSV and HSV i.m.; VACV i.n.) (Extended Data Fig. 6a-f). MnJ greatly enhanced  
228 the protection efficacy of inactivated virus by about 100 times, which is much better than Alum.  
229 Consistently, virus titers were decreased by at least 10<sup>3</sup> times in MnJ immunized mice (Fig. 7a-f),  
230 indicating that MnJ can be applied to all tested virus vaccines through either intramuscular or  
231 intranasal immunization, with greatly reduced amounts of inactivated-virus needed for an adequate  
232 protection.

233 We particularly tested MnJ in influenza vaccines. Mice immunized with virus protein HA1 (PR8)  
234 plus MnJ (i.m. or i.n.) or HA1 plus CTB (i.n.) were completely protected from lethal H1N1  
235 A/PR8/34 virus challenge, while Alum adjuvant only showed mild protection (Fig. 7g, h, Extended  
236 Data Fig. 6g-i). Importantly, MnJ enhanced the protection effect of inactivated PR8 vaccine by at

237 least 10 times (Fig. 7i). Moreover, MnJ exhibited superior protection against heterologous  
238 influenza viruses to mice immunized with MnJ-adjuvanted inactivated PR8 or HA1 protein,  
239 followed by lethal H1N1 WSN or H3N2 challenge (Extended Data Fig. 6j).

240 Finally, the adjuvant effect of MnJ on cancer vaccines was evaluated. Mice were immunized three  
241 times before inoculated with melanoma cell B16-OVA subcutaneously. Tumor growth was greatly  
242 suppressed in OVA-MnJ, but not OVA-Alum, immunized mice (Fig. 7j, Extended Data Fig. 7a), in  
243 line with prominently improved survival (Fig 7k) and increased tumor-infiltrating CD4<sup>+</sup> and CD8<sup>+</sup>  
244 T cells (Extended Data Fig. 7b, c), confirming CTL inducing activity of MnJ. In pulmonary  
245 metastasis model, OVA-MnJ immunization greatly blocked lung metastases in the WT, but not  
246 *Tmem173<sup>-/-</sup>Pycard<sup>+/-</sup>* mice (Fig. 7l, m, Extended Data Fig. 7d), which is consistent with the  
247 proliferation of CD8<sup>+</sup> OT-I T cells (Extended Data Fig. 7e). In addition, OVA-specific antibody  
248 production and CD8<sup>+</sup> T cell activation analyzed by tetramer assays were only detected in  
249 MnJ-OVA immunized WT mice (Fig. 7n, Extended Data Fig. 7f, g), suggesting its potentials in  
250 tumor therapies.

## 251 **DISCUSSION**

252 The adjuvant activity of Aluminum was found by Alexander Glenny and his colleagues in 1926<sup>41</sup>,  
253 now almost one century later, we reported the adjuvant activity of another metal-Manganese.  
254 Adjuvant effect is essentially attributed by type I-IFN-promoted dendritic cell maturation and  
255 migration to prime adaptive immune responses along with 1) local up-regulation of chemokines,  
256 including CCL2 (MCP-1) and CCL3 (MIP-1 $\alpha$ ) to recruit immune cells to the injection site; 2)

257 increase of antigen uptake by immune cells; 3) induction of monocyte differentiation into dendritic  
258 cells <sup>8,36,37</sup>. We found that Mn<sup>2+</sup> induced APCs to produce both IFN $\beta$  and various IFN $\alpha$ s, which  
259 were surprisingly not induced by LPS, together with many co-stimulatory and MHC molecules  
260 crucial for antigen presentation and chemokines for immune cell recruitment. MnJ also strongly  
261 enhanced antigen uptake by APCs and the differentiation of monocytes to dendritic cells.  
262 Importantly, Mn<sup>2+</sup> did not induce the production of pro-inflammatory cytokines IL-1 and IL-18 in  
263 human or mouse *in vitro* and *in vivo*. Therefore, MnJ demonstrated superior adjuvant effects as it  
264 induces humoral, cellular, and mucosal immune responses, particularly CTL activation, without  
265 detected side-effects. In addition, the adjuvant effect of MnJ was stable even after repeated  
266 freeze-drying cycles, whereas Alum is sensitive to freezing and requires cold-chain temperature  
267 control <sup>42,43</sup>. MnJ showed great adjuvant effects to all tested vaccine antigens including inactivated  
268 viruses, recombinant protein subunits and peptides, thus it can significantly reduce the amount of  
269 viruses needed. Particularly, its tumor antigen-specific CTL activity by either intramuscular or  
270 intranasal MnJ immunization indicated a great potential for cancer vaccines. Based on these results,  
271 we believe that MnJ has great potentials for the development of potent but safe vaccines. The  
272 component simplicity and steadiness of MnJ, the low cost and wide availability of Mn make this  
273 adjuvant even more promising.

274 Although Alum adjuvanted vaccines have been proven to be safe in most cases, some studies  
275 showed that aluminum accumulation are associated with long-lasting macrophagic myofasciitis  
276 (MMF) <sup>44</sup>, nervous disorders <sup>45</sup> and bone disease <sup>46</sup> in some patients. The FDA-approved doses of  
277 850  $\mu$ g, 1140  $\mu$ g, and 1250  $\mu$ g Alum per vaccine were determined according to antigenicity and

278 effectiveness of vaccine, not including safety consideration<sup>47-49</sup>. After vaccine injection, Alum has  
279 been found in the injected muscle, draining lymph nodes and spleen 9 months in humans<sup>50</sup> or even  
280 12 years in patients with ASIA (Autoimmune/inflammatory syndrome induced by adjuvants)<sup>51,52</sup>.  
281 Consistently, we found that intramuscularly injected Alum in mice did not show obvious clearance  
282 2 weeks after injection whereas injected MnJ was beyond detection after 8 days. Importantly, MnJ,  
283 but not Alum, could be readily decomposed into free Mn<sup>2+</sup> ions by many common acidic metabolic  
284 products or under acidic environment (data not shown). In addition, tumor microenvironment is  
285 characterized by anomalous metabolic properties and acidic environment<sup>53</sup>, which might be  
286 beneficial for the application of MnJ in antitumor therapy. Excessive Mn accumulation in the  
287 central nervous system causes neurologic toxicity in occupational cohorts through inhalation from  
288 welding or smelting<sup>26</sup>. However, we found that 20 µg MnJ induced higher antibody production  
289 than 1444 µg Imject® Alum, 1444 µg Alhydrogel® adjuvant 2%, 2259µg Adju-Phos® adjuvant  
290 (500 µg Alum in each) did, indicating MnJ is at least 25 times more potent than Alum in terms of  
291 inducing humoral immune response, which means that much smaller amount of MnJ can achieve  
292 the same effect.

293 There is still controversy about the function of NLRP3 inflammasome on adjuvant effect of  
294 aluminum salt<sup>12</sup>. These different conclusions may result from different aluminum salts or mice  
295 backgrounds used. There is also another view that ASC has an inflammasome-independent role in  
296 shaping adaptive immunity, for regulating the expression of Dock2, which is important for antigen  
297 uptake and lymphocyte mobility<sup>38</sup>. However, we found that STING, NLRP3 or ASC deficiency  
298 did not affect the expression of Dock2 in macrophages or lymphocytes. Interestingly, manganese

299 salts administration did not upregulate pro-IL-1 $\beta$  or pro-IL-18 production, which means that MnJ  
300 activate adaptive immune responses partly through an inflammasome-dependent but inflammatory  
301 cytokines-independent manner. In this regard, there may be some other stimulators upregulated by  
302 MnJ and released by pyroptotic death of cells. However, even though we did not detect IL-1/-18  
303 production by macrophages or PBMCs treated with MnCl<sub>2</sub> alone, these cells may generate these  
304 cytokines when treated with inactivated pathogens plus MnCl<sub>2</sub>. IL-1 and IL-18 can promote the  
305 infiltration of neutrophils and enhance immune responses after immunization with adjuvants like  
306 Alum or ISCOMATRIX<sup>40,54,55</sup>.

307 In addition, similar to Alum adjuvant, the MnJ nanoparticles were also able to absorb antigens  
308 like OVA, GFP or PE proteins (data not shown). The physical depot effect of MnJ retained antigens  
309 at the injection site and enhanced the uptake of antigens by APCs. Generally, MnJ is an adjuvant  
310 owning the properties of both immune potentiator and delivery system. Because of its excellent  
311 adjuvant activities and stability against repeated freezing-thaw treatment, Mn-based adjuvants  
312 would be especially useful in veterinary vaccines with the following three additional advantages. 1)  
313 MnJ showed a very nice dose-dependent adjuvant activity intramuscularly or intranasally, with 20  
314  $\mu$ g MnJ per mouse showing stronger antibody inducing activity than any tested adjuvants including  
315 CFA; 2) High MnJ dose (up to several mg/shot) and repeated administrations to mice, rabbits or  
316 pigs (data not shown) did not cause any visible damage or inflammation such as swellings and  
317 granulomas at the injection sites or in various organs; 3) Mammals keep tissue Mn levels via tight  
318 control of both absorption and excretion, as normally only 1–5% of ingested Mn is absorbed into  
319 the body<sup>56</sup> and excessive dietary Mn causes reduced Mn absorption and enhanced Mn metabolism



320 and excretion<sup>57-59</sup>. Therefore, even highly elevated Mn levels in meats caused by Mn-containing  
321 veterinary vaccines would unlikely increase gastrointestinal Mn absorption by humans. In fact, Mn  
322 contents in whole grains, rice, and nuts are around or more than 30 mg Mn/kg or even 110-140 mg  
323 Mn/kg in wheat bran, much higher than those in mammals that are between 0.3 and 2.9 mg Mn/kg  
324 wet tissue weight, confirming the tight Mn absorption by animals.

## 325 **References and Notes:**

- 326 1 Petrovsky, N. & Aguilar, J. C. Vaccine adjuvants: current state and future trends. *Immunology*  
327 *and cell biology* **82**, 488-496, doi:10.1111/j.0818-9641.2004.01272.x (2004).
- 328 2 Apostolico Jde, S., Lunardelli, V. A., Coirada, F. C., Boscardin, S. B. & Rosa, D. S. Adjuvants:  
329 Classification, Modus Operandi, and Licensing. *Journal of immunology research* **2016**,  
330 1459394, doi:10.1155/2016/1459394 (2016).
- 331 3 Pashine, A., Valiante, N. M. & Ulmer, J. B. Targeting the innate immune response with  
332 improved vaccine adjuvants. *Nature medicine* **11**, S63-68, doi:10.1038/nm1210 (2005).
- 333 4 Kaurav, M., Madan, J., Sudheesh, M. S. & Pandey, R. S. Combined adjuvant-delivery system  
334 for new generation vaccine antigens: alliance has its own advantage. *Artif Cells Nanomed*  
335 *Biotechnol* **46**, S818-S831, doi:10.1080/21691401.2018.1513941 (2018).
- 336 5 McKee, A. S. & Marrack, P. Old and new adjuvants. *Curr Opin Immunol* **47**, 44-51,  
337 doi:10.1016/j.coi.2017.06.005 (2017).
- 338 6 Clements, C. J. & Griffiths, E. The global impact of vaccines containing aluminium adjuvants.  
339 *Vaccine* **20 Suppl 3**, S24-33 (2002).
- 340 7 O'Hagan, D. T., Friedland, L. R., Hanon, E. & Didierlaurent, A. M. Towards an evidence  
341 based approach for the development of adjuvanted vaccines. *Curr Opin Immunol* **47**, 93-102,  
342 doi:10.1016/j.coi.2017.07.010 (2017).
- 343 8 Crepeaux, G. *et al.* Non-linear dose-response of aluminium hydroxide adjuvant particles:  
344 Selective low dose neurotoxicity. *Toxicology* **375**, 48-57, doi:10.1016/j.tox.2016.11.018  
345 (2017).
- 346 9 Eisenbarth, S. C., Colegio, O. R., O'Connor, W., Sutterwala, F. S. & Flavell, R. A. Crucial role  
347 for the Nalp3 inflammasome in the immunostimulatory properties of aluminium adjuvants.  
348 *Nature* **453**, 1122-1126, doi:10.1038/nature06939 (2008).

- 349 10 Kool, M. *et al.* Cutting Edge: Alum Adjuvant Stimulates Inflammatory Dendritic Cells  
350 through Activation of the NALP3 Inflammasome. *The Journal of Immunology* **181**, 3755-3759,  
351 doi:10.4049/jimmunol.181.6.3755 (2008).
- 352 11 Li, H., Willingham, S. B., Ting, J. P. Y. & Re, F. Cutting Edge: Inflammasome Activation by  
353 Alum and Alum's Adjuvant Effect Are Mediated by NLRP3. *The Journal of Immunology* **181**,  
354 17-21, doi:10.4049/jimmunol.181.1.17 (2008).
- 355 12 Marrack, P., McKee, A. S. & Munks, M. W. Towards an understanding of the adjuvant action  
356 of aluminium. *Nature reviews. Immunology* **9**, 287-293, doi:10.1038/nri2510 (2009).
- 357 13 Barber, G. N. STING: infection, inflammation and cancer. *Nature reviews. Immunology* **15**,  
358 760-770, doi:10.1038/nri3921 (2015).
- 359 14 Luo, M. *et al.* A STING-activating nanovaccine for cancer immunotherapy. *Nature*  
360 *nanotechnology* **12**, 648-654, doi:10.1038/nnano.2017.52 (2017).
- 361 15 Corrales, L. *et al.* Direct Activation of STING in the Tumor Microenvironment Leads to  
362 Potent and Systemic Tumor Regression and Immunity. *Cell reports* **11**, 1018-1030,  
363 doi:10.1016/j.celrep.2015.04.031 (2015).
- 364 16 Del Giudice, G., Rappuoli, R. & Didierlaurent, A. M. Correlates of adjuvanticity: A review on  
365 adjuvants in licensed vaccines. *Semin Immunol* **39**, 14-21, doi:10.1016/j.smim.2018.05.001  
366 (2018).
- 367 17 Sun, L., Wu, J., Du, F., Chen, X. & Chen, Z. J. Cyclic GMP-AMP synthase is a cytosolic  
368 DNA sensor that activates the type I interferon pathway. *Science* **339**, 786-791,  
369 doi:10.1126/science.1232458 (2013).
- 370 18 Ishikawa, H. & Barber, G. N. STING is an endoplasmic reticulum adaptor that facilitates  
371 innate immune signalling. *Nature* **455**, 674-678, doi:10.1038/nature07317 (2008).
- 372 19 Zhong, B. *et al.* The adaptor protein MITA links virus-sensing receptors to IRF3 transcription  
373 factor activation. *Immunity* **29**, 538-550, doi:10.1016/j.immuni.2008.09.003 (2008).
- 374 20 Sun, W. *et al.* ERIS, an endoplasmic reticulum IFN stimulator, activates innate immune  
375 signaling through dimerization. *Proc Natl Acad Sci U S A* **106**, 8653-8658,  
376 doi:10.1073/pnas.0900850106 (2009).
- 377 21 Tang, C. K. *et al.* The chemotherapeutic agent DMXAA as a unique IRF3-dependent type-2  
378 vaccine adjuvant. *PloS one* **8**, e60038, doi:10.1371/journal.pone.0060038 (2013).
- 379 22 Blaauboer, S. M., Gabrielle, V. D. & Jin, L. MPYS/STING-mediated TNF-alpha, not type I  
380 IFN, is essential for the mucosal adjuvant activity of  
381 (3'-5')-cyclic-di-guanosine-monophosphate in vivo. *Journal of immunology* **192**, 492-502,  
382 doi:10.4049/jimmunol.1301812 (2014).

- 383 23 Li, X. D. *et al.* Pivotal roles of cGAS-cGAMP signaling in antiviral defense and immune  
384 adjuvant effects. *Science* **341**, 1390-1394, doi:10.1126/science.1244040 (2013).
- 385 24 Carroll, E. C. *et al.* The Vaccine Adjuvant Chitosan Promotes Cellular Immunity via DNA  
386 Sensor cGAS-STING-Dependent Induction of Type I Interferons. *Immunity* **44**, 597-608,  
387 doi:10.1016/j.immuni.2016.02.004 (2016).
- 388 25 Horning, K. J., Caito, S. W., Tipps, K. G., Bowman, A. B. & Aschner, M. Manganese Is  
389 Essential for Neuronal Health. *Annual review of nutrition* **35**, 71-108,  
390 doi:10.1146/annurev-nutr-071714-034419 (2015).
- 391 26 Kwakye, G. F., Paoliello, M. M., Mukhopadhyay, S., Bowman, A. B. & Aschner, M.  
392 Manganese-Induced Parkinsonism and Parkinson's Disease: Shared and Distinguishable  
393 Features. *International journal of environmental research and public health* **12**, 7519-7540,  
394 doi:10.3390/ijerph120707519 (2015).
- 395 27 Waldron, K. J., Rutherford, J. C., Ford, D. & Robinson, N. J. Metalloproteins and metal  
396 sensing. *Nature* **460**, 823-830, doi:10.1038/nature08300 (2009).
- 397 28 Wang, C. *et al.* Manganese Increases the Sensitivity of the cGAS-STING Pathway for  
398 Double-Stranded DNA and Is Required for the Host Defense against DNA Viruses. *Immunity*  
399 **48**, 675-687 e677, doi:10.1016/j.immuni.2018.03.017 (2018).
- 400 29 Gaidt, M. M. *et al.* The DNA Inflammasome in Human Myeloid Cells Is Initiated by a  
401 STING-Cell Death Program Upstream of NLRP3. *Cell* **171**, 1110-1124 e1118,  
402 doi:10.1016/j.cell.2017.09.039 (2017).
- 403 30 Swanson, K. V. *et al.* A noncanonical function of cGAMP in inflammasome priming and  
404 activation. *The Journal of experimental medicine* **214**, 3611-3626, doi:10.1084/jem.20171749  
405 (2017).
- 406 31 Wree, A. *et al.* NLRP3 inflammasome driven liver injury and fibrosis: Roles of IL-17 and  
407 TNF in mice. *Hepatology*, doi:10.1002/hep.29523 (2017).
- 408 32 Amini, M. A. *et al.* Combining Tumor Microenvironment Modulating Nanoparticles with  
409 Doxorubicin to Enhance Chemotherapeutic Efficacy and Boost Antitumor Immunity. *J Natl*  
410 *Cancer Inst*, doi:10.1093/jnci/djy131 (2018).
- 411 33 Hussain, S. M. *et al.* The interaction of manganese nanoparticles with PC-12 cells induces  
412 dopamine depletion. *Toxicol Sci* **92**, 456-463, doi:10.1093/toxsci/kfl020 (2006).
- 413 34 Chen, H. *et al.* Optimisation of prime-boost immunization in mice using novel protein-based  
414 and recombinant vaccinia (Tiantan)-based HBV vaccine. *PloS one* **7**, e43730,  
415 doi:10.1371/journal.pone.0043730 (2012).

- 416 35 Lycke, N. Recent progress in mucosal vaccine development: potential and limitations. *Nature*  
417 *reviews. Immunology* **12**, 592-605, doi:10.1038/nri3251 (2012).
- 418 36 Cioncada, R. *et al.* Vaccine adjuvant MF59 promotes the intranodal differentiation of  
419 antigen-loaded and activated monocyte-derived dendritic cells. *PLoS one* **12**, e0185843,  
420 doi:10.1371/journal.pone.0185843 (2017).
- 421 37 Langlet, C. *et al.* CD64 expression distinguishes monocyte-derived and conventional dendritic  
422 cells and reveals their distinct role during intramuscular immunization. *Journal of immunology*  
423 **188**, 1751-1760, doi:10.4049/jimmunol.1102744 (2012).
- 424 38 Ippagunta, S. K. *et al.* The inflammasome adaptor ASC regulates the function of adaptive  
425 immune cells by controlling Dock2-mediated Rac activation and actin polymerization. *Nature*  
426 *immunology* **12**, 1010-1016, doi:10.1038/ni.2095 (2011).
- 427 39 Kool, M. *et al.* Alum adjuvant boosts adaptive immunity by inducing uric acid and activating  
428 inflammatory dendritic cells. *The Journal of experimental medicine* **205**, 869-882,  
429 doi:10.1084/jem.20071087 (2008).
- 430 40 Oleszycka, E. *et al.* IL-1alpha and inflammasome-independent IL-1beta promote neutrophil  
431 infiltration following alum vaccination. *The FEBS journal* **283**, 9-24, doi:10.1111/febs.13546  
432 (2016).
- 433 41 Glenny, A. T. Insoluble Precipitates in Diphtheria and Tetanus Immunization. *Br Med J* **2**,  
434 244-245, doi:10.1136/bmj.2.3632.244 (1930).
- 435 42 Clapp, T., Munks, M. W., Trivedi, R., Kompella, U. B. & Braun, L. J. Freeze-thaw stress of  
436 Alhydrogel (R) alone is sufficient to reduce the immunogenicity of a recombinant hepatitis B  
437 vaccine containing native antigen. *Vaccine* **32**, 3765-3771, doi:10.1016/j.vaccine.2014.05.037  
438 (2014).
- 439 43 Chen, D. *et al.* Characterization of the freeze sensitivity of a hepatitis B vaccine. *Hum Vaccin*  
440 **5**, 26-32 (2009).
- 441 44 Rigolet, M. *et al.* Clinical features in patients with long-lasting macrophagic myofasciitis.  
442 *Front Neurol* **5**, 230, doi:10.3389/fneur.2014.00230 (2014).
- 443 45 Maya, S., Prakash, T., Madhu, K. D. & Goli, D. Multifaceted effects of aluminium in  
444 neurodegenerative diseases: A review. *Biomedicine & pharmacotherapy = Biomedecine &*  
445 *pharmacotherapie* **83**, 746-754, doi:10.1016/j.biopha.2016.07.035 (2016).
- 446 46 Crisponi, G. *et al.* The meaning of aluminium exposure on human health and  
447 aluminium-related diseases. *Biomol Concepts* **4**, 77-87, doi:10.1515/bmc-2012-0045 (2013).
- 448 47 Baylor, N. W., Egan, W. & Richman, P. Aluminum salts in vaccines - US perspective (vol 20,  
449 pg S18, 2002). *Vaccine* **20**, 3428-3428 (2002).

- 450 48 May, J. C., Progar, J. J. & Chin, R. The Aluminum Content of Biological Products Containing  
451 Aluminum Adjuvants - Determination by Atomic-Absorption Spectrometry. *J Biol Stand* **12**,  
452 175-183 (1984).
- 453 49 Lyons-Weiler, J. & Ricketson, R. Reconsideration of the immunotherapeutic pediatric safe  
454 dose levels of aluminum. *J Trace Elem Med Bio* **48**, 67-73 (2018).
- 455 50 Crepeaux, G. *et al.* Highly delayed systemic translocation of aluminum-based adjuvant in CD1  
456 mice following intramuscular injections. *J Inorg Biochem* **152**, 199-205,  
457 doi:10.1016/j.jinorgbio.2015.07.004 (2015).
- 458 51 Gherardi, R. K. *et al.* Macrophagic myofasciitis lesions assess long-term persistence of  
459 vaccine-derived aluminium hydroxide in muscle. *Brain* **124**, 1821-1831,  
460 doi:10.1093/brain/124.9.1821 (2001).
- 461 52 Watad, A. *et al.* Autoimmune/inflammatory syndrome induced by adjuvants (ASIA)  
462 demonstrates distinct autoimmune and autoinflammatory disease associations according to the  
463 adjuvant subtype: Insights from an analysis of 500 cases. *Clin Immunol* **203**, 1-8,  
464 doi:10.1016/j.clim.2019.03.007 (2019).
- 465 53 Lyssiotis, C. A. & Kimmelman, A. C. Metabolic Interactions in the Tumor Microenvironment.  
466 *Trends Cell Biol* **27**, 863-875, doi:10.1016/j.tcb.2017.06.003 (2017).
- 467 54 Ben-Sasson, S. Z. *et al.* IL-1 acts directly on CD4 T cells to enhance their antigen-driven  
468 expansion and differentiation. *Proceedings of the National Academy of Sciences of the United*  
469 *States of America* **106**, 7119-7124, doi:10.1073/pnas.0902745106 (2009).
- 470 55 Wilson, N. S. *et al.* Inflammasome-dependent and -independent IL-18 production mediates  
471 immunity to the ISCOMATRIX adjuvant. *Journal of immunology* **192**, 3259-3268,  
472 doi:10.4049/jimmunol.1302011 (2014).
- 473 56 Williams, M. *et al.* in *Toxicological Profile for Manganese Agency for Toxic Substances and*  
474 *Disease Registry (ATSDR) Toxicological Profiles* (2012).
- 475 57 Davis, C. D., Zech, L. & Greger, J. L. Manganese metabolism in rats: an improved  
476 methodology for assessing gut endogenous losses. *Proc Soc Exp Biol Med* **202**, 103-108  
477 (1993).
- 478 58 Britton, A. A. & Cotzias, G. C. Dependence of manganese turnover on intake. *Am J Physiol*  
479 **211**, 203-206, doi:10.1152/ajplegacy.1966.211.1.203 (1966).
- 480 59 Mahoney, J. P. & Small, W. J. Studies on manganese. 3. The biological half-life of  
481 radiomanganese in man and factors which affect this half-life. *J Clin Invest* **47**, 643-653,  
482 doi:10.1172/JCI105760 (1968).
- 483

484 **Acknowledgements:** We thank Ms. Liying Du, Drs Hongxia Lv, Guilan Li, Xiaochen Li from  
485 National Center for Protein Sciences at Peking University in Beijing, China, for assistance with  
486 FACS, protein purification and microscopy. We thank Drs. Yan Shi for OT-I and OT-II mice,  
487 Zhijian Chen for *Mavs*<sup>-/-</sup> mice, Rongbin Zhou for *Ifnar*<sup>-/-</sup> mice, Tadatsugu Taniguchi for *Irf3*<sup>-/-</sup>  
488 *Irf7*<sup>-/-</sup> mice, Vishva M. Dixit for *Aim2*<sup>-/-</sup>, *Pycard*<sup>-/-</sup>, *Nlrc4*<sup>-/-</sup> and *Nlrp3*<sup>-/-</sup> mice, Hongbing Shu,  
489 Yonghui Zhang, Wenjun Liu, Min Fang for viruses, Yonghui Zhang, Wenhui Li, Wenjie Tan,  
490 Changfa Fan for antigens. This work was supported by National Natural Science Foundation of  
491 China (31830022 and 81621001) and the Chinese Ministry of Science and Technology  
492 (2015CB943203).

493 **Author contributions:** R.Z., C.W. and Z.J. designed research; R.Z., C.W. and Y.G. performed the  
494 experiments, X.W., M.J., M.S., M.L., J.X. and Y.W. assisted in the experiments. R.Z., C.W. and Z.J.  
495 analyzed the data and wrote the manuscript.

496 **Competing interests:** The authors declare no competing interests.

497 **Data and materials availability:** All data supporting the findings of this study are available within  
498 the paper and its supplementary materials.

499 RNA-seq data have been deposited in Gene Expression Omnibus under accession no. GSE126586.

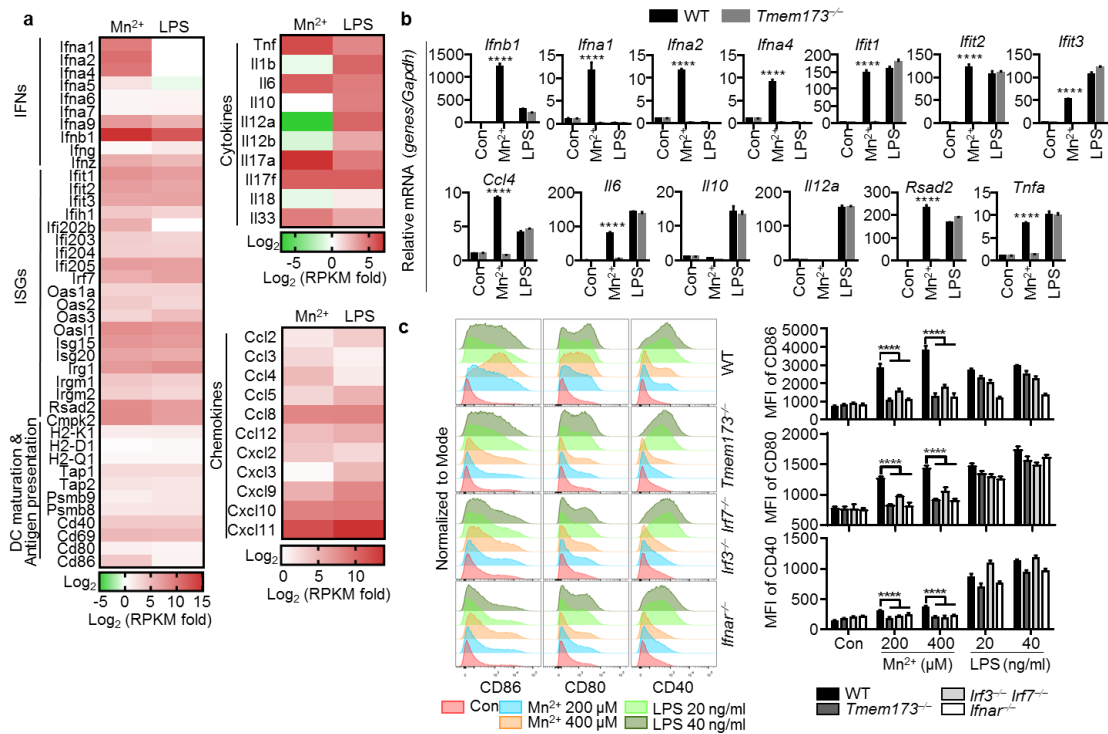

500

501 **Fig. 1| Mn<sup>2+</sup> Promotes DC Maturation via cGAS-STING Activation. a**, Heatmap of RNA-seq  
 502 analysis. BMDCs were untreated or treated with MnCl<sub>2</sub> (200 μM) or LPS (100 ng/ml) for 20 h.  
 503 Heatmap was made by calculating log<sub>2</sub> ((treated RPKM)/(control RPKM)). **b**, Quantitative  
 504 RT-PCR analysis of the indicated gene expression in the WT and *Tmem173*<sup>-/-</sup> BMDCs treated with  
 505 MnCl<sub>2</sub> (200 μM) or LPS (100 ng/ml) for 20 h. **c**, BMDCs from the WT, *Tmem173*<sup>-/-</sup>, *Irf3*<sup>-/-</sup>*Irf7*<sup>-/-</sup>  
 506 or *Ifnar*<sup>-/-</sup> mice were treated with the indicated concentrations of MnCl<sub>2</sub> or LPS for 20 h. CD86,  
 507 CD80 and CD40 expression was analyzed by FACS. One representative experiment of at least  
 508 three independent experiments is shown, and each was done in triplicate. Error bars represent SEM;  
 509 **b**, data were analyzed by two-way ANOVA; **c**, data were analyzed by an unpaired t test. ns, not  
 510 significant; \* P < 0.05; \*\* P < 0.01; \*\*\* P < 0.001; \*\*\*\* P < 0.0001.



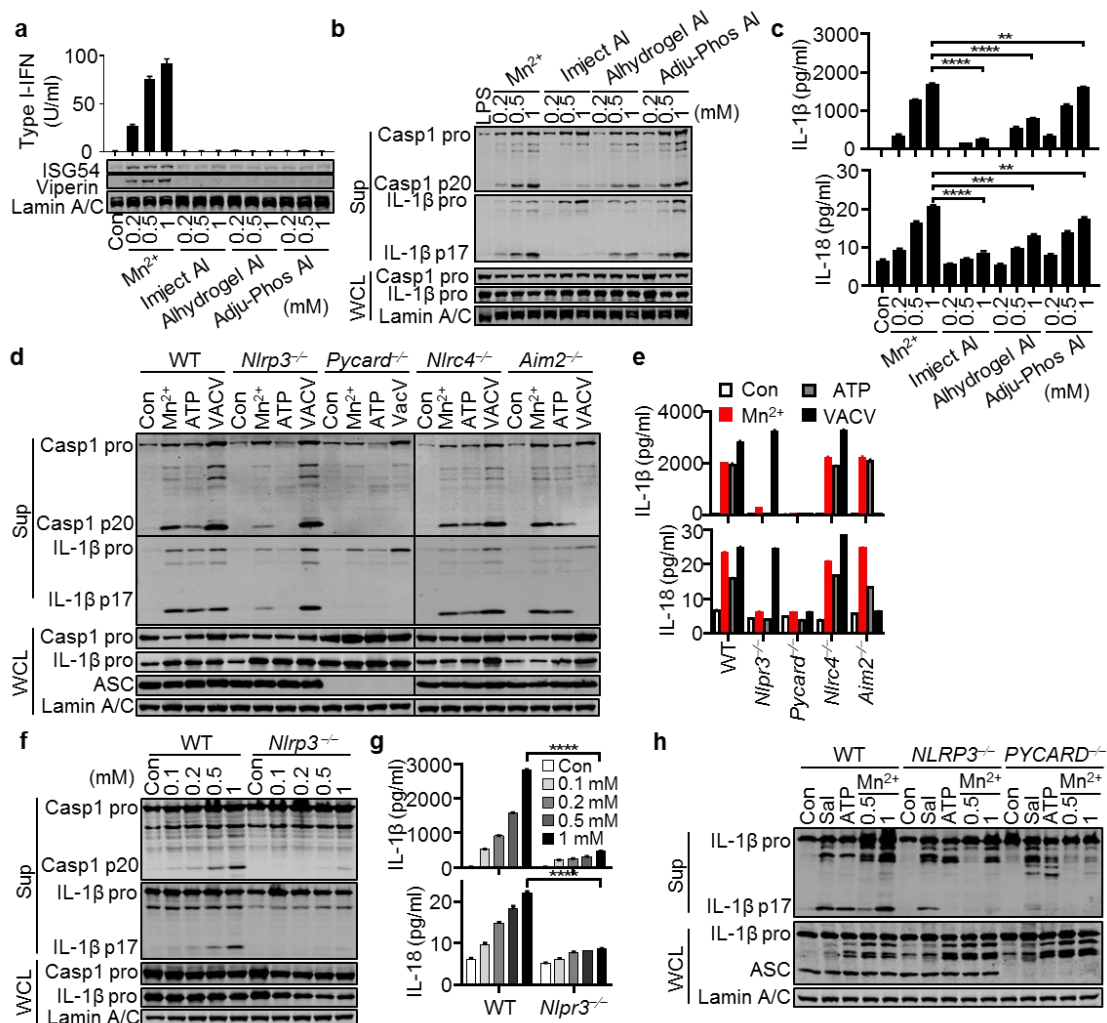

511

512 **Fig. 2| Mn<sup>2+</sup> Activates NLRP3 Inflammasome. a,** Western blot (lower) and Type I-IFN  
 513 production analysis (upper) of mouse peritoneal macrophages treated with the indicated  
 514 concentrations of MnCl<sub>2</sub> or Aluminium salts (Imject® Alum, Alhydrogel® adjuvant 2%,  
 515 Adju-Phos® adjuvant) for 18 h. **b, c,** Western blot (**b**) and ELISA analysis (**c**) of inflammasome  
 516 activation of LPS-primed C57BL/6 peritoneal macrophages treated with the indicated  
 517 concentrations of MnCl<sub>2</sub> or Aluminium salts for 5 h. Supernatants (Sup) and whole cell lysates  
 518 (WCL) were analyzed by immunoblotting with the indicated antibodies. **d, e,** Western blot (**d**) and  
 519 ELISA analysis (**e**) of inflammasome activation of LPS-primed WT, *Nlrp3*<sup>-/-</sup>, *Pycard*<sup>-/-</sup>, *Nlrp4*<sup>-/-</sup>



520 and *Aim2*<sup>-/-</sup> peritoneal macrophages treated with MnCl<sub>2</sub> (0.5 mM), ATP (5 mM) or VACV (MOI =  
521 10). **f, g**, Western blot (**f**) and ELISA analysis (**g**) of inflammasome activation of LPS-primed WT  
522 and *Nlrp3*<sup>-/-</sup> peritoneal macrophages treated with the indicated concentrations of MnCl<sub>2</sub> for 5 h. **h**,  
523 Western blot analysis of inflammasome activation of LPS-primed THP1 cells treated with  
524 Salmonella (Sal, MOI = 10), ATP (5 mM) or MnCl<sub>2</sub> (0.5 and 1 mM). One representative  
525 experiment of at least three independent experiments is shown, and each was done in triplicate.  
526 Error bars represent SEM; **a, c, g**, data were analyzed by an unpaired t test. ns, not significant; \* P  
527 < 0.05; \*\* P < 0.01; \*\*\* P < 0.001; \*\*\*\* P < 0.0001.

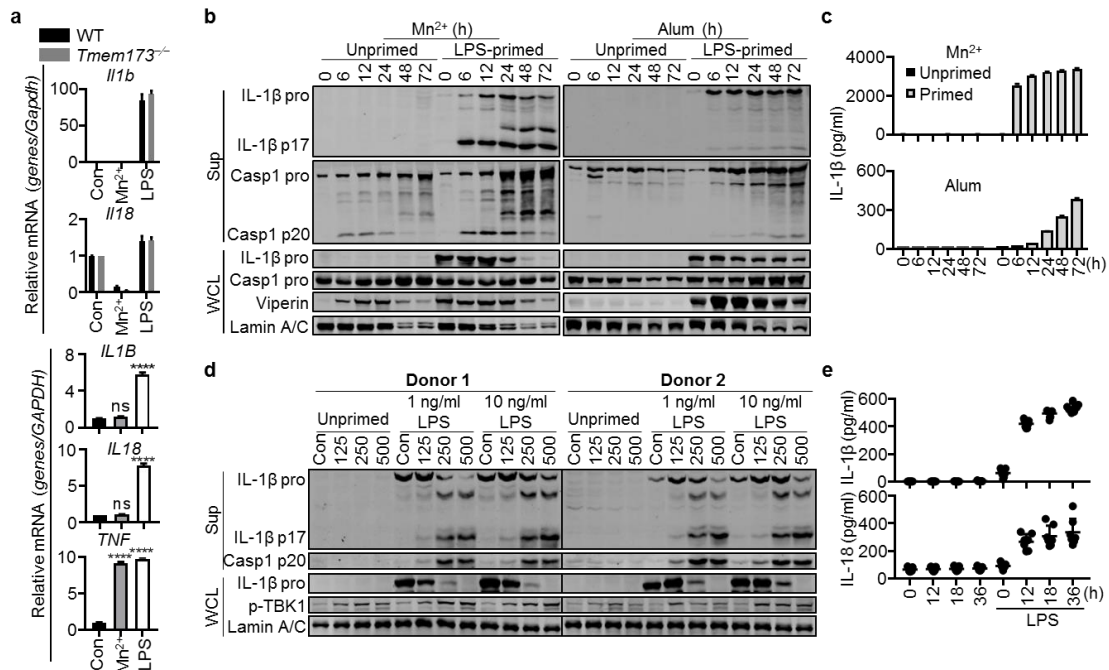

528

529 **Fig. 3| Mn<sup>2+</sup> Activates Inflammasome without IL-1/18 Production.** **a**, Quantitative RT-PCR

530 analysis of the indicated gene expression in the WT and *Tmem173*<sup>-/-</sup> BMDCs (upper) or human

531 Mo-DCs (lower) treated with MnCl<sub>2</sub> (200 μM) or LPS (100 ng/ml) for 20 h. **b**, **c**, Unprimed or

532 LPS-primed mouse peritoneal macrophages were treated with MnCl<sub>2</sub> (200 μM) or Alum (100

533 μg/ml) for the indicated times. Supernatants (Sup) and whole cell lysates (WCL) were analyzed by

534 immunoblotting with the indicated antibodies (**b**). IL-1β in supernatants was analyzed by ELISA

535 (**c**). **d**, **e**, Unprimed or LPS (1 ng/ml or 10 ng/ml)-primed human PBMCs were treated with MnCl<sub>2</sub>

536 (200 μM) for the indicated times. Supernatants and whole cell lysates were analyzed by

537 immunoblotting with the indicated antibodies (**d**). Human IL-1β and IL-18 in supernatants were

538 analyzed by ELISA (**e**). One representative experiment of at least three independent experiments is

539 shown, and each was done in triplicate. Error bars represent SEM; **a**, data were analyzed by an

540 unpaired t test. ns, not significant; \* P < 0.05; \*\* P < 0.01; \*\*\* P < 0.001; \*\*\*\* P < 0.0001.

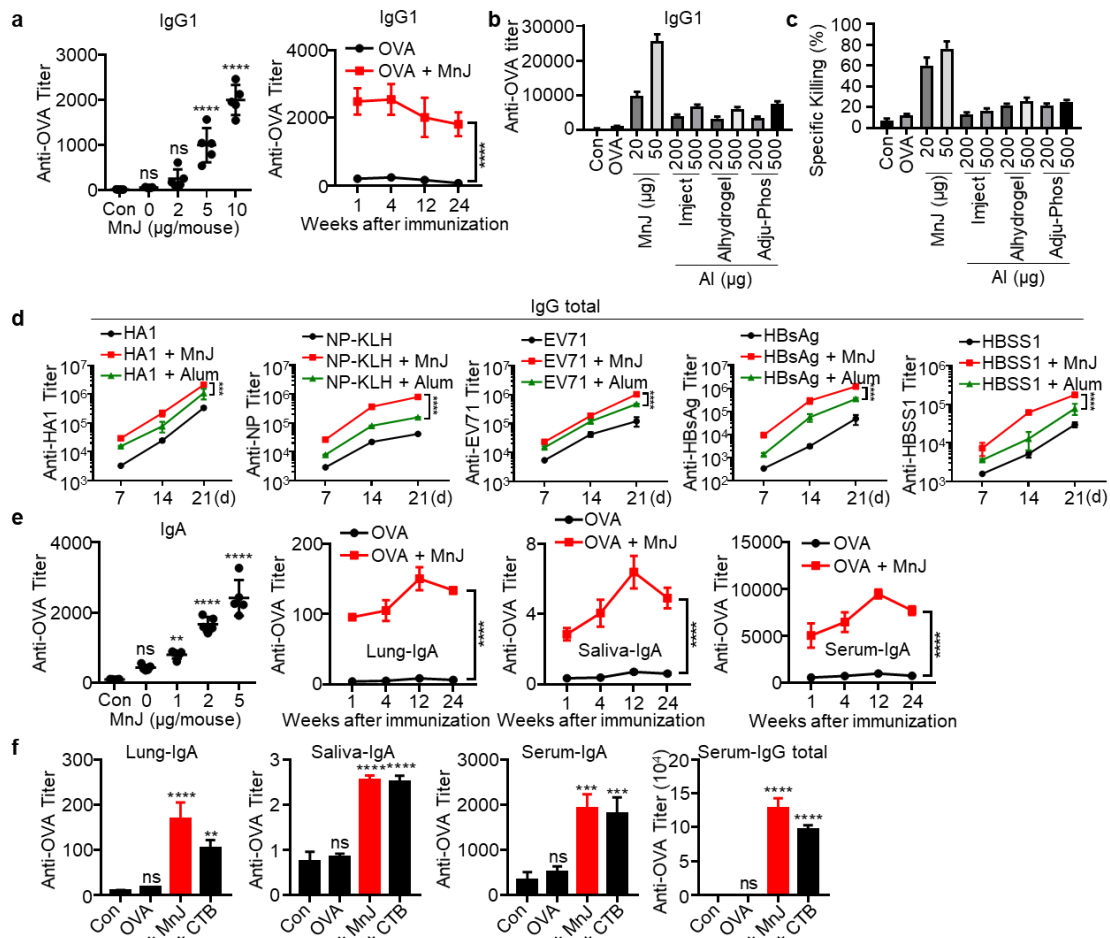

541

542 **Fig. 4| MnJ Is A Potent Universal Adjuvant.** **a**, The WT mice (C57BL/6) were immunized  
 543 intramuscularly with PBS or OVA (10 µg) + MnJ (0, 2, 5 or 10 µg) on day 0, 7 and 14. Sera were  
 544 collected on day 21 to measure OVA-specific IgG1 by ELISA (left, n = 5). Time course of  
 545 OVA-specific IgG1 in sera from mice immunized intramuscularly with OVA (10 µg) + MnJ (10 µg)  
 546 for three times (right, n = 3). **b**, **c**, The WT mice were immunized intramuscularly with PBS, OVA  
 547 (10 µg), OVA (10 µg) + MnJ (5 µg) or OVA (10 µg) + indicated amounts of Aluminium salts. Sera  
 548 were collected on day 21 to measure OVA-specific IgG1 by ELISA (**b**) (n = 4). OVA-specific  
 549 cytotoxicity was measured on day 21 in an *in vivo* killing assay (**c**) (immunized on day 0, 7 and 14,  
 550 n = 4). **d**, The WT mice were immunized intramuscularly with the indicated antigen (5 µg), antigen

551 (5  $\mu$ g) + MnJ (10  $\mu$ g) or antigen (5  $\mu$ g) + Alum (1320  $\mu$ g) on day 0, 7 and 14. Sera were collected  
552 on day 7, 14 and 21 to measure HA1, NP, EV71, HBsAg or HBSS1-specific IgG total (n = 3). **e**,  
553 The WT mice were immunized intranasally with PBS or OVA (10  $\mu$ g) + MnJ (0, 1, 2 or 5  $\mu$ g) on  
554 day 0, 7 and 14. Sera were collected on day 21 to measure OVA-specific IgA by ELISA (left, n =  
555 5). Time course of OVA-specific IgA in BALF, saliva and serum as indicated from mice  
556 immunized intranasally with OVA (10  $\mu$ g) + MnJ (5  $\mu$ g) for three times (n = 3). **f**, OVA-specific  
557 IgA and IgG total were measured by ELISA on day 21 after immunization with OVA (10  $\mu$ g), OVA  
558 (10  $\mu$ g) + MnJ (5  $\mu$ g) or OVA (10  $\mu$ g) + CTB (10  $\mu$ g) intranasally on day 0, 7 and 14 (n = 3). One  
559 representative experiment of at least three independent experiments is shown, and each was done  
560 in triplicate. Error bars represent SEM; **d**, data were analyzed by two-way ANOVA; **a**, **e**, **f**, data  
561 were analyzed by an unpaired t test. ns, not significant; \* P < 0.05; \*\* P < 0.01; \*\*\* P < 0.001;  
562 \*\*\*\* P < 0.0001.

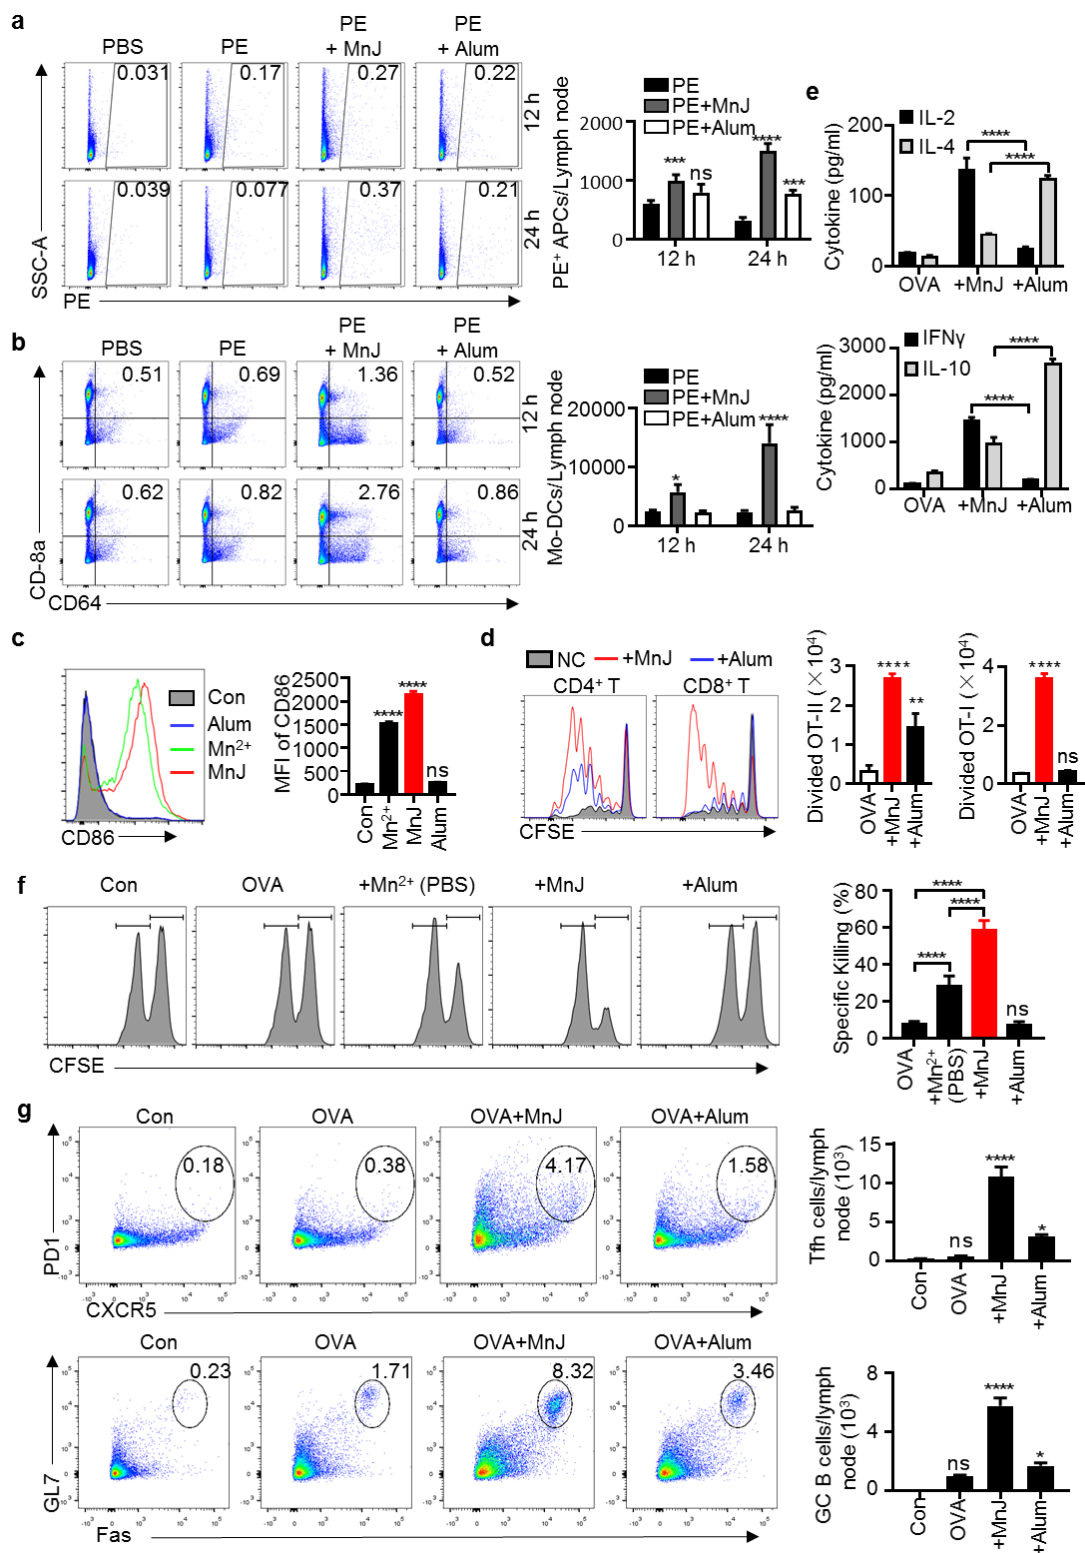

563

564 **Fig. 5| MnJ Promotes Antigen Presentation and T Cell Responses.** a, b, The WT mice were

565 immunized subcutaneously with PBS, Phycoerythrin (PE, 10 μg), PE (10 μg) + MnJ (20 μg) or PE

566 (10 µg) + Alum (200 µg). Inguinal lymph nodes were collected 12 or 24 h later (n = 3). Ratio and  
567 number of PE<sup>+</sup> APCs (**a**) and Mo-DCs (**b**) in dLN cells were analyzed by FACS. Live cells were  
568 identified by DAPI staining. Among live singlet cells, APCs were identified as the cell subset  
569 single or double positive for CD11c and F4/80. Among APCs, Mo-DCs were identified as CD8a<sup>+</sup>  
570 CD64<sup>+</sup> cells. **c**, BMDCs were treated with MnCl<sub>2</sub> (20 µg/ml), MnJ (20 µg/ml) or Alum (20 µg/ml)  
571 for 20 h. CD86 expression was analyzed by FACS. **d**, CD45.1<sup>+</sup> OT-I CD8<sup>+</sup> or OT-II CD4<sup>+</sup> T cells  
572 were labeled with CFSE and transferred to CD45.2<sup>+</sup> WT mice. These mice were then immunized  
573 with OVA (1 µg), OVA (1 µg) + MnJ (10 µg) or OVA (1 µg) + Alum (1320 µg). After 3 days, T cell  
574 proliferation was analyzed by FACS (n = 3). **e**, The WT mice were immunized intramuscularly  
575 with OVA (10 µg), OVA (10 µg) + MnJ (10 µg) or OVA (10 µg) + Alum (1320 µg) on day 0, 7 and  
576 14. Splenocytes were collected on day 21, and stimulated with OVA (100 µg/ml). IL-2, IL-4, IFN $\gamma$   
577 and IL-10 secreted by T cells were measured by ELISA (n = 3). **f**, OVA-specific cytotoxicity was  
578 measured on day 21 in an *in vivo* killing assay (immunized on day 0, 7 and 14, n = 4). **g**, Numbers  
579 of Tfh or GC B cells in dLN from WT mice were analyzed by FACS. Live cells were identified by  
580 DAPI staining. Among live singlet cells, CD4<sup>+</sup> T cells were identified as the cell subset double  
581 positive for CD3 and CD4. Among CD4<sup>+</sup> T cells, Tfh cells were identified as PD1<sup>+</sup> CXCR5<sup>+</sup> cells.  
582 B cells were identified as the cell subset double positive for CD45 and B220. Among B cells, GC B  
583 cells were identified as Fas<sup>+</sup> GL7<sup>+</sup> cells. One representative experiment of at least three  
584 independent experiments is shown, and each was done in triplicate. Error bars represent SEM; **a, b,**  
585 **e**, data were analyzed by two-way ANOVA; **c, d, f, g**, data were analyzed by an unpaired t test. ns,  
586 not significant; \* P < 0.05; \*\* P < 0.01; \*\*\* P < 0.001; \*\*\*\* P < 0.0001.

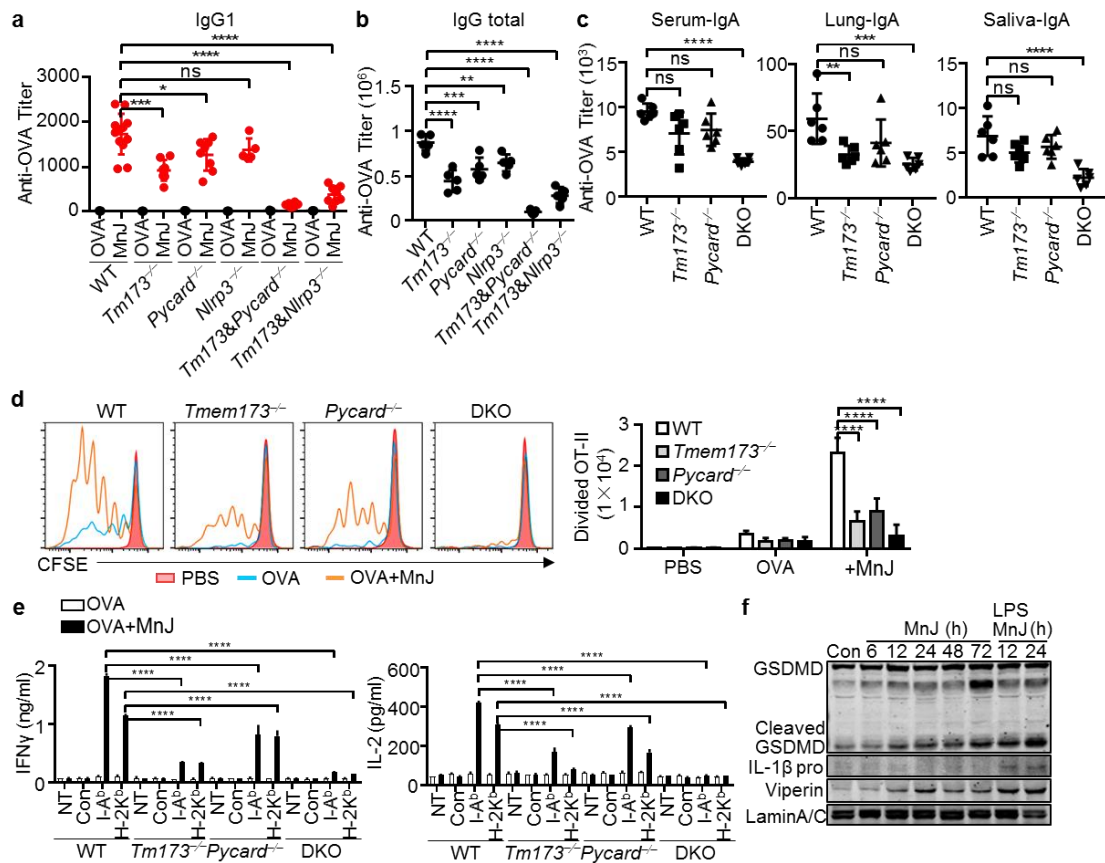

587

588 **Fig. 6| Both cGAS-STING and NLRP3 Inflammasome Contribute to Adjuvant Activity of**

589 **MnJ. a, b**, OVA-specific IgG1 (a) and IgG total (b) from the WT, *Tmem173*<sup>+/-</sup>, *Pycard*<sup>+/-</sup>, *Nlrp3*<sup>+/-</sup>,

590 *Tmem173*<sup>+/-</sup>*Pycard*<sup>+/-</sup> and *Tmem173*<sup>+/-</sup>*Nlrp3*<sup>+/-</sup> mice were measured by ELISA on day 14 after

591 immunization with OVA (10  $\mu$ g) or OVA (10  $\mu$ g) + MnJ (10  $\mu$ g) intramuscularly on day 0 and 7 (n >

592 5). c, OVA-specific IgA from the WT, *Tmem173*<sup>+/-</sup>, *Pycard*<sup>+/-</sup> and *Tmem173*<sup>+/-</sup>*Pycard*<sup>+/-</sup> DKO mice

593 was measured by ELISA on day 21 after immunization with OVA (10  $\mu$ g) or OVA (10  $\mu$ g) + MnJ

594 (5  $\mu$ g) intranasally on day 0, 7 and 14 (n = 6). d, CD45.1<sup>+</sup> OT-II CD4<sup>+</sup> T cells were labeled with

595 CFSE and transferred to CD45.2<sup>+</sup> WT, *Tmem173*<sup>+/-</sup>, *Pycard*<sup>+/-</sup> and *Tmem173*<sup>+/-</sup>*Pycard*<sup>+/-</sup> DKO mice.

596 These mice were then immunized with PBS, OVA (1  $\mu$ g) or OVA (1  $\mu$ g) + MnJ (10  $\mu$ g). After 3

597 days, T cell proliferation was analyzed by FACS (n = 3). e, The WT, *Tmem173*<sup>+/-</sup>, *Pycard*<sup>+/-</sup> and

598 *Tmem173<sup>-/-</sup>Pycard<sup>-/-</sup>* DKO mice were immunized as (a). Splenocytes were collected on day 21,  
599 and stimulated with OVA peptides. IFN $\gamma$  and IL-2 secreted by T cells were measured by ELISA (n  
600 = 3). f, The WT mice were immunized with MnJ (100  $\mu$ g) or LPS (20  $\mu$ g) + MnJ (100  $\mu$ g)  
601 intramuscularly for the indicated times. Lysates of draining lymph node cells were analyzed by  
602 immunoblotting with the indicated antibodies. One representative experiment of at least three  
603 independent experiments is shown, and each was done in triplicate. Error bars represent SEM; data  
604 were analyzed by an unpaired t test. ns, not significant; \* P < 0.05; \*\* P < 0.01; \*\*\* P < 0.001; \*\*\*\*  
605 P < 0.0001.



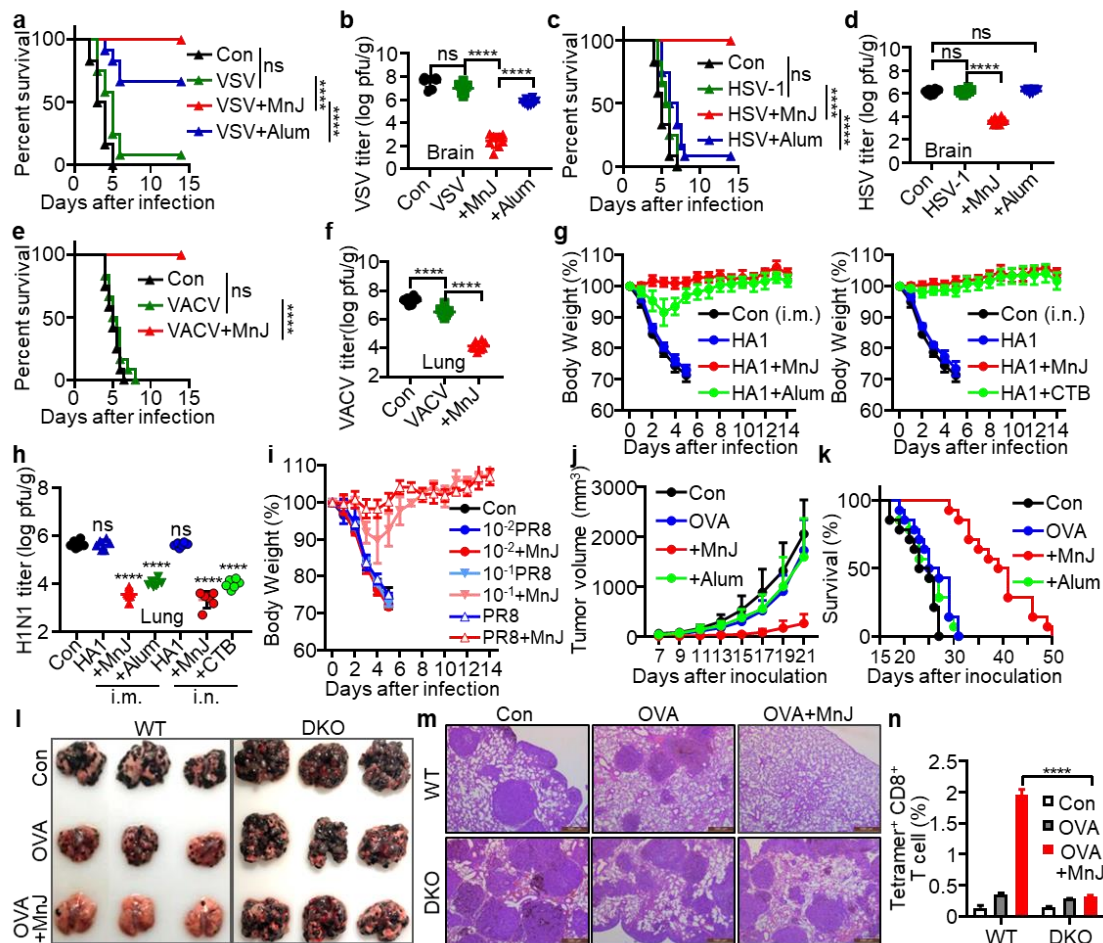

606

607 **Fig. 7| MnJ Is A Potent Adjuvant for Antiviral and Antitumor Vaccines. a, b,** The WT mice  
 608 were immunized intramuscularly with PBS, inactivated VSV ( $10^5$  pfu), inactivated VSV ( $10^5$  pfu)  
 609 + MnJ (10  $\mu$ g) or inactivated VSV ( $10^5$  pfu) + Alum (1320  $\mu$ g) on day 0. On day 10, these mice  
 610 were infected intravenously with a lethal dose of VSV. The survival was monitored for 2 weeks (n  
 611 = 12) (**a**). Viral loads in brain were measured 5 days after infection (n = 8) (**b**). **c, d,** The WT mice  
 612 were immunized intramuscularly with PBS, inactivated HSV-1 ( $10^3$  pfu), inactivated HSV-1 ( $10^3$   
 613 pfu) + MnJ (10  $\mu$ g) or inactivated HSV-1 ( $10^3$  pfu) + Alum (1320  $\mu$ g) on day 0. On day 10, these  
 614 mice were infected intraperitoneally with a lethal dose of HSV-1. The survival was monitored for 2  
 615 weeks (n = 12) (**c**). Viral loads in brain were measured 5 days after infection (n = 8) (**d**). **e, f,** The

616 WT mice were immunized intranasally with PBS, inactivated VACV ( $2 \times 10^4$  pfu) or inactivated  
617 VACV ( $2 \times 10^4$  pfu) + MnJ (5  $\mu$ g) on day 0 and 7. On day 14, these mice were infected intranasally  
618 with a lethal dose of VACV. The survival was monitored for 2 weeks (n = 12) (e). Viral loads in  
619 lung were measured 5 days after infection (n = 8) (f). **g**, The WT mice were immunized  
620 intramuscularly (i.m.) with HA1 (5  $\mu$ g), HA1 (5  $\mu$ g) + MnJ (10  $\mu$ g), HA1 (5  $\mu$ g) + Alum (1320  $\mu$ g)  
621 or intranasally (i.n.) with HA1 (5  $\mu$ g), HA1 (5  $\mu$ g) + MnJ (10  $\mu$ g), or HA1 (5  $\mu$ g) + CTB (10  $\mu$ g) on  
622 day 0, 7 and 14. On day 21, these mice were infected intranasally with a lethal dose of PR8. The  
623 survival was monitored for 2 weeks (n = 10). **h**, The WT mice were immunized intranasally with  
624 PBS, inactivated PR8 ( $5 \times 10^6$  pfu),  $10^{-1}$  PR8 ( $5 \times 10^5$  pfu) or  $10^{-2}$  PR8 ( $5 \times 10^4$  pfu) with or  
625 without MnJ (5  $\mu$ g) on day 0 and 7. On day 14, these mice were infected intranasally with a lethal  
626 dose of PR8. The body weight was recorded for 2 weeks (n = 3). **i**, Viral loads in lungs from mice  
627 in (g) were measured 5 days after infection (n = 6). **j**, **k**, The WT mice were immunized  
628 intramuscularly with PBS, OVA (10  $\mu$ g), OVA (10  $\mu$ g) + MnJ (20  $\mu$ g) or OVA (10  $\mu$ g) + Alum  
629 (1320  $\mu$ g) on day 0, 7 and 14. On day 21, these mice were inoculated with B16-OVA-Fluc cells ( $3$   
630  $\times 10^5$ ) subcutaneously. Tumor volume (**j**) was measured and survival (**k**) was monitored (n = 14). **l**,  
631 **m**, **n**, The WT and DKO mice were immunized intramuscularly with PBS, OVA (10  $\mu$ g), or OVA  
632 (10  $\mu$ g) + MnJ (20  $\mu$ g) on day 0, 7 and 14. On day 21, these mice were inoculated with  
633 B16-F10-OVA ( $3 \times 10^5$ ) intravenously. Images (**l**) and HE staining (**m**) of lung tissues were  
634 recorded 20 days after inoculation (n = 6). The percentage of tetramer<sup>+</sup> CD8<sup>+</sup> T cells in spleens of  
635 these mice was analyzed by FACS on day 21 (n = 3) (**n**). One representative experiment of at least  
636 three independent experiments is shown, and each was done in triplicate. Error bars represent SEM;

637 **b, d, f, h, n**, data were analyzed by an unpaired t test; **a, c, e, k**, survival plot data were analyzed

638 with log-rank (Mantel–Cox) tests. ns, not significant; \* P < 0.05; \*\* P < 0.01; \*\*\* P<0.001; \*\*\*\* P

639 < 0.0001.
